# Supplementary material for: EASIX, Modified EASIX and Simplified EASIX as an Early Predictor for Intensive Care Unit Admission and Mortality in Severe COVID-19 Patients
Source: MDPI journal article supplement (doi:10.3390/jpm12071022), 2022-06-21
Supplement: s1 [file s1]

**Table S1.** Correlation of EASIX with variables being assessed and characteristics of patients with high EASIX ( $\geq 2.36$ ) and low EASIX ( $< 2.36$ ). Parameters and quantitative variables are presented as median [interquartile range - IQR]; qualitative variables are presented as frequency/number.

| Variable                                             | EASIX <i>p</i> -value | High EASIX<br><i>n</i> = 111 | Low EASIX<br><i>n</i> = 258 | <i>p</i> -value  |
|------------------------------------------------------|-----------------------|------------------------------|-----------------------------|------------------|
| Male                                                 | <b>&lt;0.001</b>      | 82 (73.9%)                   | 159 (66.0%)                 | <b>0.023</b>     |
| Age                                                  | 0.125                 | 68 [61–76]                   | 68 [60–74]                  | 0.639            |
| Death                                                | <b>&lt;0.001</b>      | 95 (85.6%)                   | 148 (57.4%)                 | <b>&lt;0.001</b> |
| Concomitant diseases                                 |                       |                              |                             |                  |
| Cardiovascular diseases                              | <b>&lt;0.001</b>      | 87 (78.4%)                   | 163 (63.2%)                 | <b>0.004</b>     |
| Hypertension                                         | <b>&lt;0.001</b>      | 82 (73.9%)                   | 148 (%)                     | <b>0.003</b>     |
| Atrial fibrillation                                  | 0.110                 | 17 (15.3%)                   | <b>30 (11.6%)</b>           | 0.330            |
| Ischemic heart disease                               | 0.050                 | 34 (30.6%)                   | <b>52 (20.2%)</b>           | <b>0.029</b>     |
| Pulmonary diseases                                   | 0.345                 | 8 (7.2%)                     | 28 (10.9%)                  | 0.279            |
| Asthma                                               | 0.894                 | 5 (4.5%)                     | 14 (5.4%)                   | 0.713            |
| COPD                                                 | 0.951                 | 3 (2.7%)                     | 8 (3.1%)                    | 0.837            |
| Other                                                | 0.424                 | 2 (1.8%)                     | 6 (2.3%)                    | 0.751            |
| Diabetes                                             | 0.223                 | 46 (41.4%)                   | 88 (34.1%)                  | 0.179            |
| Malignant neoplasm                                   | <b>0.033</b>          | 13 (11.7%)                   | 44 (17.1%)                  | 0.193            |
| Chronic kidney disease                               | <b>&lt;0.001</b>      | 25 (22.3%)                   | 8 (3.1%)                    | <b>&lt;0.001</b> |
| Obesity                                              | 0.925                 | 31 (27.9%)                   | 74 (28.7%)                  | 0.883            |
| SpO <sub>2</sub> without oxygen supply               | <b>0.014</b>          | 83 [70–90]                   | 87 [82–92]                  | <b>&lt;0.001</b> |
| Severity (according to WHO scale)                    |                       |                              |                             |                  |
| 1                                                    | <b>0.027</b>          | 1 (0.9%)                     | 4 (1.6%)                    | 0.076            |
| 2                                                    |                       | 27 (24.3%)                   | 76 (29.5%)                  |                  |
| 3                                                    |                       | 64 (57.7%)                   | 157 (60.8%)                 |                  |
| 4                                                    |                       | 19 (17.1%)                   | 21 (8.1%)                   |                  |
| Duration of hospitalisation, days                    | <b>0.019</b>          | 12 [6–20]                    | 18 [12–25]                  | <b>&lt;0.001</b> |
| Duration of symptoms before hospital admission, days | 0.549                 | 6 [4–8]                      | 7 [5–9]                     | 0.181            |
| Deterioration, days (from disease onset)             | <b>&lt;0.001</b>      | 7 [4–9]                      | 8 [5–12]                    | <b>0.002</b>     |
| ICU admission                                        | <b>0.026</b>          | 80 (72.1%)                   | 135 (52.3%)                 | <b>0.001</b>     |
| ICU admission, days (from disease onset)             | <b>0.032</b>          | 9 [7–16]                     | 12 [8–17]                   | 0.102            |
| ICU admission, days (from hospitalisation onset)     | <b>0.042</b>          | 3 [1–7]                      | 4 [2–8]                     | 0.062            |
| ICU duration, days                                   | <b>&lt;0.001</b>      | 9 [6–17]                     | 13 [8–20]                   | <b>0.009</b>     |
| Non-rebreather mask 10-15l/min                       | 0.764                 | 104 (93.7%)                  | 247 (95.7%)                 | 0.403            |
| Non-rebreather mask 10-15l/min duration, days        | <b>&lt;0.001</b>      | 1 [0–2]                      | 2 [1–3]                     | <b>&lt;0.001</b> |
| HFNO                                                 | 0.622                 | 72 (64.9%)                   | 181 (70.2%)                 | 0.315            |
| HFNO duration, days                                  | <b>&lt;0.001</b>      | 2 [1–6]                      | 5 [2–9]                     | <b>&lt;0.001</b> |
| NIV                                                  | 0.271                 | 24 (21.8%)                   | 45 (17.4%)                  | 0.325            |
| NIV duration, days                                   | 0.835                 | 3 [1–5]                      | 4 [1–7]                     | 0.604            |
| IMV                                                  | <b>&lt;0.001</b>      | 82 (74.6%)                   | 137 (53.1%)                 | <b>&lt;0.001</b> |
| IMV duration, days                                   | <b>0.008</b>          | 8 [5–16]                     | 12 [7–19]                   | <b>0.006</b>     |

| Lab test results  |                  |                       |                     |                  |
|-------------------|------------------|-----------------------|---------------------|------------------|
| CRP               | <b>0.001</b>     | 143.2 [78.5–214.7]    | 112.3 [55.7–188.5]  | <b>0.012</b>     |
| Procalcitonin     | <b>&lt;0.001</b> | 0.722 [0.283–2.89]    | 0.157 [0.084–0.474] | <b>&lt;0.001</b> |
| Ferritin          | <b>&lt;0.001</b> | 2137.8 [985.3–3608.3] | 1037 [526.7–1611.6] | <b>&lt;0.001</b> |
| LDH               | <b>&lt;0.001</b> | 685 [530–897]         | 471 [376–592]       | <b>&lt;0.001</b> |
| White blood count | <b>0.003</b>     | 7.06 [5.13–9.55]      | 8.04 [5.81–10.78]   | 0.079            |
| Neutrophils       | <b>0.011</b>     | 5.6 [4.05–8]          | 6.6 [4.2–8.9]       | 0.147            |
| Lymphocytes       | <b>0.021</b>     | 0.8 [0.6–1.1]         | 0.9 [0.6–1.2]       | 0.067            |
| Haemoglobin       | 0.326            | 13.3 [11.6–14.7]      | 13.4 [12.3–14.7]    | 0.608            |
| Thrombocytes      | <b>&lt;0.001</b> | 159 [128–196]         | 223 [170–297]       | <b>&lt;0.001</b> |
| D-dimer           | <b>0.030</b>     | 2017 [1037–3326]      | 1264 [822–2424]     | <b>&lt;0.001</b> |
| INR               | <b>0.042</b>     | 1.12 [1.04–1.3]       | 1.08 [1.01–1.16]    | <b>0.001</b>     |
| AST               | <b>&lt;0.001</b> | 69.4 [46.6–105]       | 50 [36.2–67.8]      | <b>&lt;0.001</b> |
| ALT               | 0.146            | 42 [25.9–69]          | 38 [25–63.3]        | 0.313            |
| Creatinine        | <b>&lt;0.001</b> | 1.71 [1.28–2.4]       | 0.91 [0.76–1.13]    | <b>&lt;0.001</b> |

**Table S2.** Correlation of mEASIX with the variables being assessed and characteristics of patients with high mEASIX ( $\geq 704.05$ ) and low mEASIX ( $< 704.05$ ). Parameters and quantitative variables are presented as median [interquartile range – IQR]; qualitative variables are presented as frequency/number.

| Variable                                             | mEASIX <i>p</i> -value | High mEASIX<br><i>n</i> = 124 | Low mEASIX<br><i>n</i> = 246 | <i>p</i> -value  |
|------------------------------------------------------|------------------------|-------------------------------|------------------------------|------------------|
| Male                                                 | <b>&lt;0.001</b>       | 93 (75.0%)                    | 149 (60.6%)                  | <b>0.006</b>     |
| Age                                                  | <b>0.032</b>           | 67 [60–74]                    | 68 [61–74.5]                 | 0.682            |
| Death                                                | <b>&lt;0.001</b>       | 91 (73.4%)                    | 152 (61.8%)                  | <b>0.027</b>     |
| Concomitant diseases                                 |                        |                               |                              |                  |
| Cardiovascular diseases                              | 0.334                  | 89 (71.8%)                    | 162 (65.9%)                  | 0.569            |
| Hypertension                                         | 0.672                  | 79 (63.7%)                    | 152 (61.8%)                  | 0.719            |
| Atrial fibrillation                                  | 0.484                  | 21 (16.9%)                    | 26 (10.6%)                   | 0.083            |
| Ischemic heart disease                               | 0.723                  | 32 (25.8%)                    | 54 (22.0%)                   | <b>0.407</b>     |
| Pulmonary diseases                                   | 0.608                  | 11 (8.9%)                     | 25 (10.2%)                   | 0.692            |
| Asthma                                               | 0.388                  | 9 (7.3%)                      | 10 (4.1%)                    | 0.189            |
| COPD                                                 | 0.875                  | 3 (2.4%)                      | 8 (3.3%)                     | 0.656            |
| Other                                                | 0.196                  | 1 (0.8%)                      | 7 (2.8%)                     | 0.203            |
| Diabetes                                             | 0.474                  | 46 (37.1%)                    | 88 (35.8%)                   | 0.802            |
| Malignant neoplasm                                   | <b>0.026</b>           | 16 (12.9%)                    | 41 (16.7%)                   | 0.344            |
| Chronic kidney disease                               | 0.793                  | 8 (6.5%)                      | 24 (9.8%)                    | 0.286            |
| Obesity                                              | 0.843                  | 33 (26.6%)                    | 72 (29.3%)                   | 0.593            |
| SpO <sub>2</sub> without oxygen supply               | <b>&lt;0.001</b>       | 80 [68–88]                    | 87 [81–92]                   | <b>&lt;0.001</b> |
| Severity (according to WHO scale)                    |                        |                               |                              |                  |
| 1                                                    | 0.296                  | 0 (0.0%)                      | 5 (2.0%)                     | <b>&lt;0.001</b> |
| 2                                                    |                        | 17 (13.7%)                    | 86 (35.0%)                   |                  |
| 3                                                    |                        | 87 (70.2%)                    | 135 (54.9%)                  |                  |
| 4                                                    |                        | 20 (16.1%)                    | 20 (8.1%)                    |                  |
| Duration of hospitalisation, days                    | 0.226                  | 12 [5–20]                     | 17 [11–25]                   | <b>&lt;0.001</b> |
| Duration of symptoms before hospital admission, days | <b>0.025</b>           | 7 [5–8]                       | 7 [4–9]                      | 0.617            |
| Deterioration, days (from disease onset)             | 0.064                  | 7 [5–9]                       | 8 [5–10]                     | 0.199            |
| ICU admission                                        | <b>0.019</b>           | 84 (67.7%)                    | 132 (53.7%)                  | <b>0.017</b>     |

|                                                  |                  |                     |                   |                  |
|--------------------------------------------------|------------------|---------------------|-------------------|------------------|
| ICU admission, days (from disease onset)         | 0.098            | 9 [6.5–15]          | 12 [7–17]         | 0.050            |
| ICU admission, days (from hospitalisation onset) | 0.241            | 2 [0–4]             | 5 [2–8]           | <b>&lt;0.001</b> |
| ICU duration, days                               | 0.134            | 11 [5–18]           | 11.5 [6–18]       | 0.314            |
| Non-rebreather mask 10-15l/min                   | 0.127            | 114 (91.9%)         | 238 (96.8%)       | <b>0.042</b>     |
| Non-rebreather mask 10-15l/min duration, days    | 0.321            | 1 [0–2]             | 2 [1–3]           | <b>&lt;0.001</b> |
| HFNO                                             | 0.959            | 79 (63.7%)          | 174 (70.7%)       | 0.170            |
| HFNO duration, days                              | 0.126            | 2 [1–5]             | 5 [2–9]           | <b>&lt;0.001</b> |
| NIV                                              | 0.133            | 27 (21.8%)          | 42 (17.1%)        | 0.273            |
| NIV duration, days                               | 0.057            | 3 [2–5]             | 4 [1–6]           | 0.741            |
| IMV                                              | 0.138            | 87 (70.2%)          | 133 (54.1%)       | <b>0.003</b>     |
| IMV duration, days                               | 0.178            | 10 [4–16]           | 11 [6–18]         | 0.062            |
| Lab test results                                 |                  |                     |                   |                  |
| CRP                                              | <b>&lt;0.001</b> | 233.3 [180.2–296.1] | 96.4 [51.6–155.7] | <b>&lt;0.001</b> |
| Procalcitonin                                    | <b>&lt;0.001</b> | 0.91 [0.25–1.69]    | 0.16 [0.07–0.49]  | <b>&lt;0.001</b> |
| Ferritin                                         | <b>&lt;0.001</b> | 2321 [979–4474]     | 1086 [546–1750]   | <b>&lt;0.001</b> |
| LDH                                              | <b>&lt;0.001</b> | 777 [588–954]       | 476 [374–602]     | <b>&lt;0.001</b> |
| White blood count                                | 0.245            | 8.18 [5.49–11.08]   | 7.55 [5.51–10.34] | 0.671            |
| Neutrophils                                      | <b>0.003</b>     | 6.7 [4.6–10.0]      | 6 [3.9–8.6]       | 0.162            |
| Lymphocytes                                      | <b>&lt;0.001</b> | 0.7 [0.5–0.9]       | 0.9 [0.6–1.2]     | <b>0.004</b>     |
| Haemoglobin                                      | 0.711            | 13.3 [10.9–14.6]    | 13.4 [12.2–14.7]  | 0.216            |
| Thrombocytes                                     | <b>&lt;0.001</b> | 153 [123–204]       | 211 [163–281]     | <b>&lt;0.001</b> |
| D-dimer                                          | <b>&lt;0.001</b> | 2180 [1173–3950]    | 1258 [797–2426]   | <b>&lt;0.001</b> |
| INR                                              | <b>&lt;0.001</b> | 1.14 [1.05–1.22]    | 1.08 [1.0–1.1]    | <b>0.002</b>     |
| AST                                              | <b>&lt;0.001</b> | 74 [52–106]         | 50 [36–69]        | <b>&lt;0.001</b> |
| ALT                                              | <b>&lt;0.001</b> | 46 [31–82]          | 37 [25–61]        | <b>0.005</b>     |
| Creatinine                                       | <b>&lt;0.001</b> | 1.36 [0.98–1.79]    | 0.99 [0.79–1.29]  | <b>&lt;0.001</b> |

**Table S3.** Correlation of sEASIX with variables being assessed and characteristics of patients with high sEASIX ( $\geq 3.81$ ) and low sEASIX ( $< 3.81$ ). Parameters and quantitative variables are presented as median [interquartile range—IQR]; qualitative variables are presented as frequency/number.

|                                        | sEASIX <i>p</i> -value | High sEASIX   | Low sEASIX     | <i>p</i> -value  |
|----------------------------------------|------------------------|---------------|----------------|------------------|
| Variable                               |                        | <i>n</i> = 91 | <i>n</i> = 279 |                  |
| Male                                   | 0.052                  | 60 (66.7%)    | 182 (65.2%)    | 0.903            |
| Age                                    | 0.087                  | 68 [60–74]    | 68 [61–75]     | 0.582            |
| Death                                  | <b>&lt;0.001</b>       | 77 (84.6%)    | 166 (59.5%)    | <b>&lt;0.001</b> |
| Concomitant diseases                   |                        |               |                |                  |
| Cardiovascular diseases                | <b>0.027</b>           | 69 (75.8%)    | 182 (65.2%)    | 0.060            |
| Hypertension                           | 0.319                  | 65 (72.2%)    | 166 (59.5%)    | 0.051            |
| Atrial fibrillation                    | 0.411                  | 14 (15.6%)    | 33 (11.8%)     | 0.376            |
| Ischemic heart disease                 | 0.644                  | 23 (25.6%)    | 63 (22.6%)     | 0.597            |
| Pulmonary diseases                     | 0.782                  | 10 (11.0%)    | 26 (9.3%)      | 0.641            |
| Asthma                                 | 0.358                  | 7 (7.8%)      | 12 (4.3%)      | 0.203            |
| COPD                                   | 0.963                  | 3 (3.3%)      | 8 (2.9%)       | 0.834            |
| Other                                  | 0.948                  | 2 (2.2%)      | 6 (2.2%)       | 0.979            |
| Diabetes                               | 0.658                  | 36 (39.6%)    | 98 (35.1%)     | 0.614            |
| Malignant neoplasm                     | <b>0.046</b>           | 15 (16.5%)    | 42 (15.1%)     | 0.743            |
| Chronic kidney disease                 | 0.420                  | 11 (12.1%)    | 22 (7.9%)      | 0.222            |
| Obesity                                | 0.799                  | 22 (24.2%)    | 83 (29.8%)     | 0.306            |
| SpO <sub>2</sub> without oxygen supply | <b>0.001</b>           | 84 [72–90]    | 87 [80–92]     | <b>0.015</b>     |

|                                                      |                  |                    |                    |                  |
|------------------------------------------------------|------------------|--------------------|--------------------|------------------|
| Severity (according to WHO scale)                    |                  |                    |                    |                  |
| 1                                                    | 0.095            | 1 (1.1%)           | 4 (1.4%)           | <b>0.049</b>     |
| 2                                                    |                  | 22 (24.4%)         | 81 (29.1%)         |                  |
| 3                                                    |                  | 51 (56.6%)         | 171 (61.3%)        |                  |
| 4                                                    |                  | 17 (18.9%)         | 23 (8.2%)          |                  |
| Duration of hospitalisation, days                    | 0.160            | 13.5 [7–21]        | 17 [11–25]         | <b>0.003</b>     |
| Duration of symptoms before hospital admission, days | 0.949            | 7 [5–8]            | 7 [4–9]            | 0.860            |
| Deterioration, days (from disease onset)             | 0.089            | 7 [5–9]            | 8 [5–11]           | 0.306            |
| ICU admission                                        | <b>0.001</b>     | 66 (73.3%)         | 150 (53.8%)        | <b>0.004</b>     |
| ICU admission, days (from disease onset)             | 0.078            | 10 [7–15.5]        | 12 [7–17]          | 0.301            |
| ICU admission, days (from hospitalisation onset)     | 0.154            | 3 [0–6]            | 4 [2–8]            | <b>0.033</b>     |
| ICU duration, days                                   | <b>0.035</b>     | 11 [6–17.5]        | 11 [6–18]          | 0.621            |
| Non-rebreather mask 10-15l/min                       | 0.300            | 84 (92.3%)         | 268 (96.1%)        | 0.149            |
| Non-rebreather mask 10-15l/min duration, days        | 0.187            | 1 [0–3]            | 2 [1–3]            | <b>0.001</b>     |
| HFNO                                                 | 0.825            | 53 (58.2%)         | 200 (71.7%)        | <b>0.017</b>     |
| HFNO duration, days                                  | 0.161            | 2 [1–4]            | 5 [2–9]            | <b>&lt;0.001</b> |
| NIV                                                  | 0.404            | 17 (18.9%)         | 52 (18.6%)         | 0.958            |
| NIV duration, days                                   | <b>0.003</b>     | 3 [1–7]            | 3 [1–6]            | 0.871            |
| IMV                                                  | 0.134            | 68 (75.6%)         | 152 (54.5%)        | <b>&lt;0.001</b> |
| IMV duration, days                                   | 0.056            | 10 [6–17]          | 11 [6–17]          | 0.490            |
| Lab test results                                     |                  |                    |                    |                  |
| CRP                                                  | <b>0.011</b>     | 150.4 [86.3–220.1] | 113.9 [57.7–186.8] | <b>0.018</b>     |
| Procalcitonin                                        | <b>&lt;0.001</b> | 0.49 [0.19–1.21]   | 0.18 [0.09–0.66]   | <b>&lt;0.001</b> |
| Ferritin                                             | <b>&lt;0.001</b> | 2116 [740–3340]    | 1146 [566–1672]    | <b>0.004</b>     |
| LDH                                                  | <b>&lt;0.001</b> | 772 [619–935]      | 464 [374–588]      | <b>&lt;0.001</b> |
| White blood count                                    | <b>&lt;0.001</b> | 7.02 [4.66–9.04]   | 8.21 [5.81–10.97]  | <b>0.002</b>     |
| Neutrophils                                          | <b>&lt;0.001</b> | 5.4 [3.7–7.9]      | 6.7 [4.2–9.4]      | <b>0.010</b>     |
| Lymphocytes                                          | <b>&lt;0.001</b> | 0.8 [0.5–1.0]      | 0.9 [0.6–1.2]      | <b>0.009</b>     |
| Haemoglobin                                          | 0.089            | 13.2 [11.8–14.7]   | 13.5 [12.2–14.7]   | 0.512            |
| Thrombocytes                                         | <b>&lt;0.001</b> | 148 [116–183]      | 226 [172–297]      | <b>&lt;0.001</b> |
| D-dimer                                              | 0.286            | 1798 [1046–3442]   | 1366 [818–2644]    | <b>0.034</b>     |
| INR                                                  | 0.848            | 1.12 [1.03–1.24]   | 1.08 [1.02–1.19]   | 0.122            |
| AST                                                  | <b>&lt;0.001</b> | 74 [50–106]        | 50 [36–68]         | <b>&lt;0.001</b> |
| ALT                                                  | <b>&lt;0.001</b> | 43 [30–76]         | 37 [25–61]         | <b>0.032</b>     |
| Creatinine                                           | <b>&lt;0.001</b> | 1.27 [0.87–1.79]   | 1 [0.8–1.32]       | <b>0.002</b>     |
